# Supplementary material for: Synthesis of mixed poly(ε-caprolactone)/polystyrene brushes from Y-initiator-functionalized silica particles by surface-initiated ring-opening polymerization and nitroxide-mediated radical polymerization
Source: Royal Society of Chemistry journal article supplement (doi:10.1039/c4ra02429j), 2014-01-01
Supplement: c4ra02429j1.pdf [file c4ra02429j1.pdf]

**Supplementary Information for:**

**Synthesis of Mixed Poly( $\epsilon$ -caprolactone)/Polystyrene Brushes from Y-Initiator-  
Functionalized Silica Particles by Surface-Initiated Ring-Opening Polymerization and  
Nitroxide-Mediated Radical Polymerization**

*Weikun Li,<sup>†</sup> Chunhui Bao,<sup>†</sup> Roger A. E. Wright, and Bin Zhao\**

Department of Chemistry, University of Tennessee, Knoxville, TN 37996, United States

<sup>†</sup> Contributed equally to the work. \* Corresponding author. Email: [zhao@ion.chem.utk.edu](mailto:zhao@ion.chem.utk.edu)

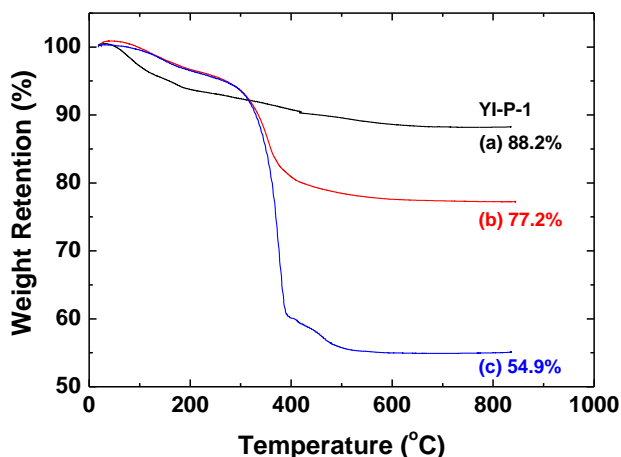

**Figure S1.** Thermogravimetric analysis (TGA) of (a) Y-initiator-functionalized silica particles (YI-P-1), (b) PCL brush-grafted silica particles with PCL  $M_{n,SEC}$  of 25.8 kDa synthesized from YI-P-1, and (c) mixed PCL/PS brush-grafted silica particles with PCL  $M_{n,SEC}$  of 25.8 kDa and PS  $M_{n,SEC}$  of 24.5 kDa. TGA was performed in air at a heating rate of 20 °C/min from room temperature to 800 °C.

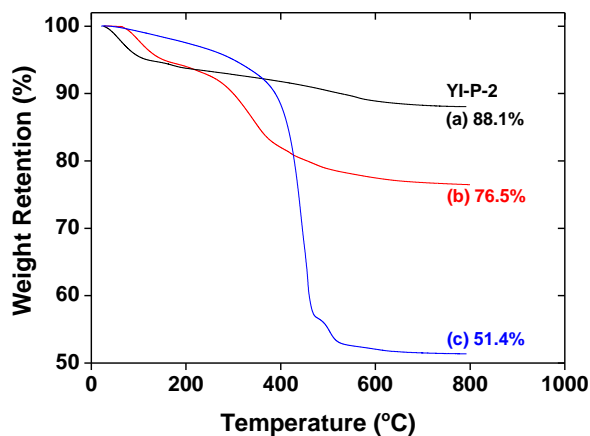

**Figure S2.** Thermogravimetric analysis (TGA) of (a) Y-initiator-functionalized silica particles (YI-P-2), (b) PCL brush-grafted silica particles with PCL  $M_{n,SEC}$  of 25.4 kDa synthesized from YI-P-2, and (c) mixed PCL/PS brush-grafted silica particles with PCL  $M_{n,SEC}$  of 25.4 kDa and PS  $M_{n,SEC}$  of 25.2 kDa. TGA was performed in air at a heating rate of 20 °C/min.

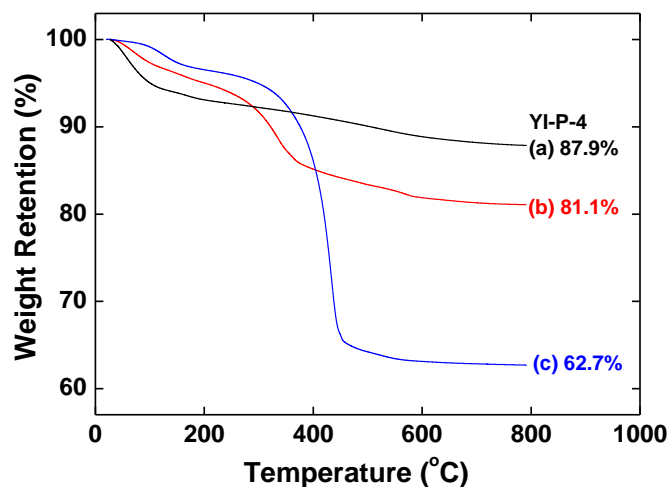

**Figure S3.** Thermogravimetric analysis (TGA) of (a) Y-initiator-functionalized silica particles (YI-P-4), (b) PCL brush-grafted silica particles with PCL  $M_{n,SEC}$  of 24.0 kDa synthesized from YI-P-4, and (c) mixed PCL/PS brush-grafted silica particles with PCL  $M_{n,SEC}$  of 24.0 kDa and PS  $M_{n,SEC}$  of 24.0 kDa. TGA was performed in air at a heating rate of 20 °C/min from room temperature to 800 °C.

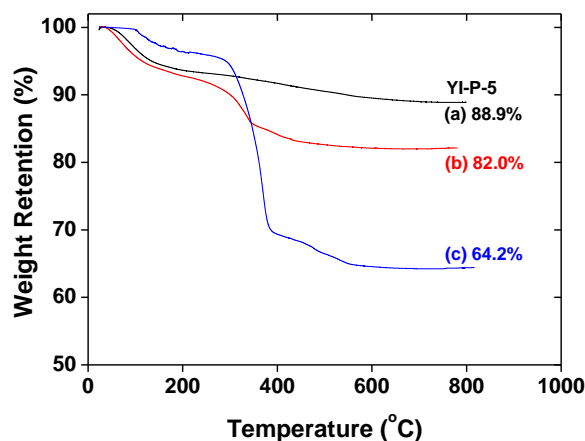

**Figure S4.** Thermogravimetric analysis (TGA) of (a) Y-initiator-functionalized silica particles (YI-P-5), (b) PCL brush-grafted silica particles with PCL  $M_{n,SEC}$  of 25.6 kDa synthesized from YI-P-5, and (c) mixed PCL/PS brush-grafted silica particles with PCL  $M_{n,SEC}$  of 25.6 kDa and PS  $M_{n,SEC}$  of 24.3 kDa. TGA was performed in air at a heating rate of 20 °C/min from room temperature to 800 °C.

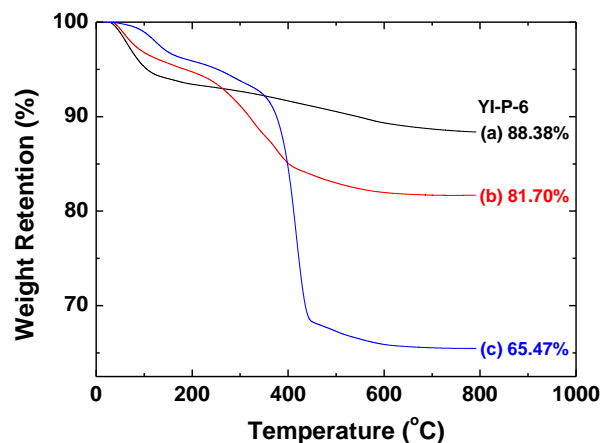

**Figure S5.** Thermogravimetric analysis (TGA) of (a) Y-initiator-functionalized silica particles (YI-P-6), (b) PCL brush-grafted silica particles with PCL  $M_{n,SEC}$  of 27.1 kDa synthesized from YI-P-6, and (c) mixed PCL/PS brush-grafted silica particles with PCL  $M_{n,SEC}$  of 27.1 kDa and PS  $M_{n,SEC}$  of 24.2 kDa. TGA was performed in air at a heating rate of 20 °C/min from room temperature to 800 °C.

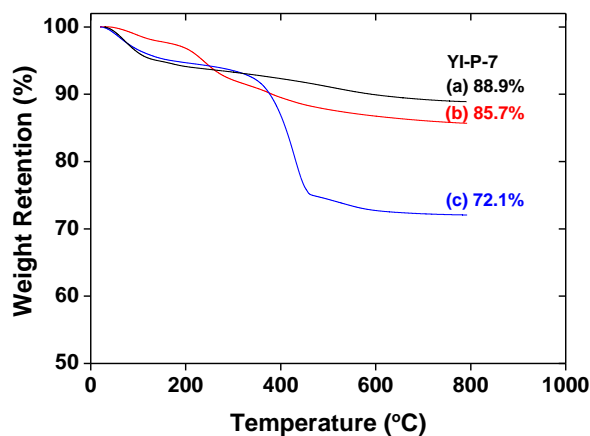

**Figure S6.** Thermogravimetric analysis (TGA) of (a) Y-initiator-functionalized silica particles (YI-P-7), (b) PCL brush-grafted silica particles with PCL  $M_{n,SEC}$  of 24.2 kDa synthesized from YI-P-7, and (c) mixed PCL/PS brush-grafted silica particles with PCL  $M_{n,SEC}$  of 24.2 kDa and PS  $M_{n,SEC}$  of 23.8 kDa. TGA was performed in air at a heating rate of 20 °C/min from room temperature to 800 °C.
